# Supplementary material
Source: HighWire-hosted journal article supplement (https://www.eneuro.org/content/5/1/ENEURO.0322-17.2018)
Supplement: inline-supplementary-material-3 [file inline-supplementary-material-3.pdf]

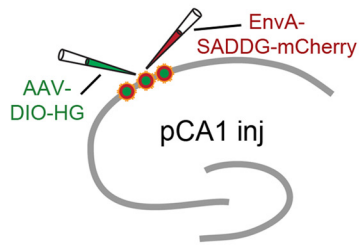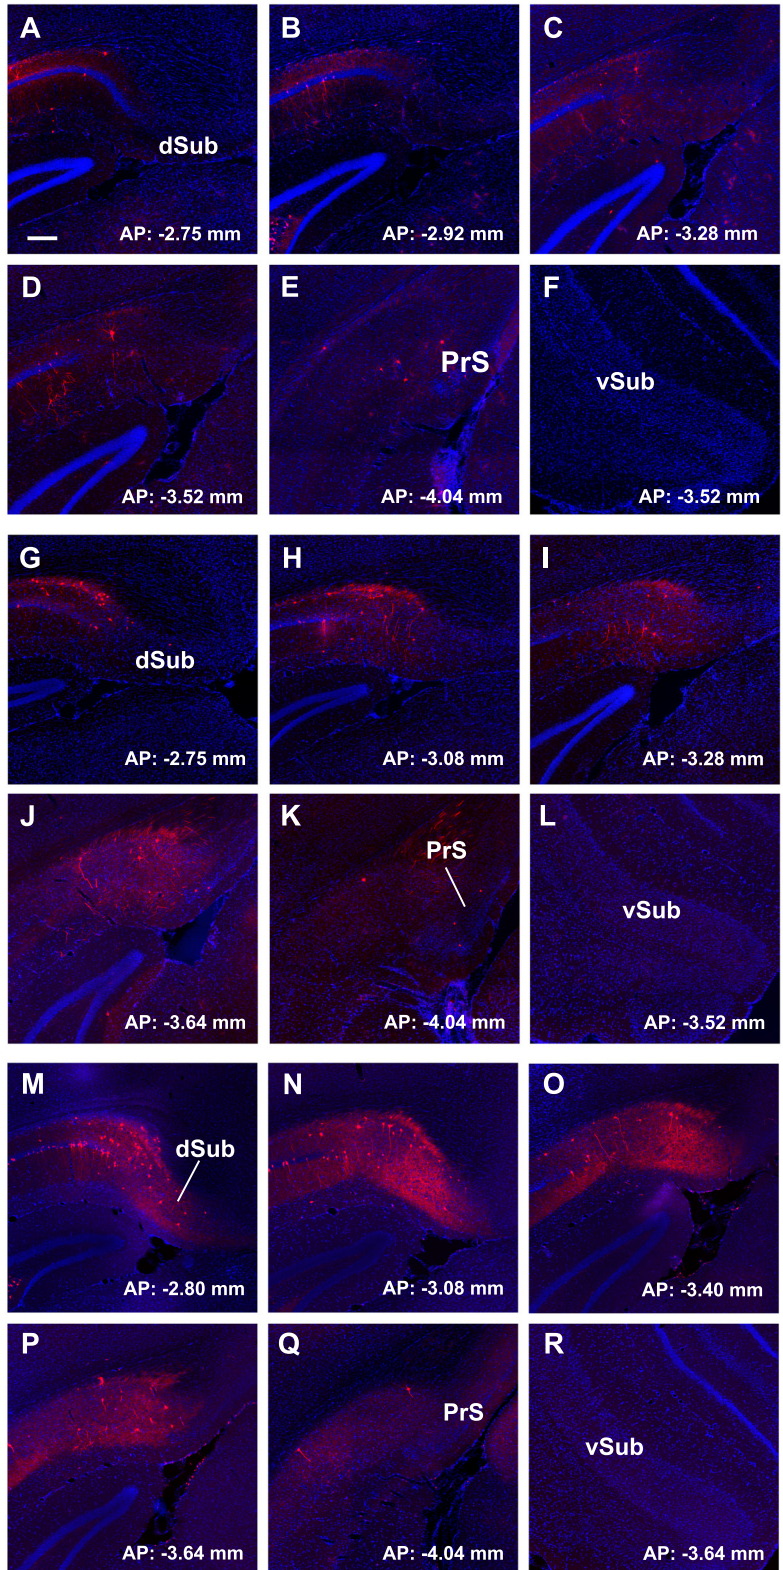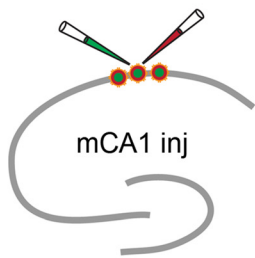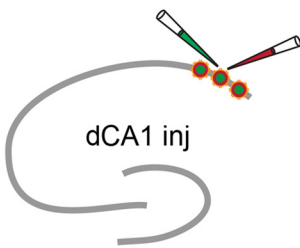

Figure 4-1
